# Supplementary material for: Transcriptional stress in aging: integrating experimental data and modeling to quantify DNA damage accumulation
Source: Front Mol Biosci. 2025 Sep 8;12:1659589. doi: 10.3389/fmolb.2025.1659589 (PMC12450475; doi:10.3389/fmolb.2025.1659589)
Supplement: Supplementary file 1 [file Table2.xlsx]

## Sheet: Suppl Table 2 nascent RNA young
id	Gene length (bp)	young1	young2	young3	Average
NM_001001130	7335	27	12	10	16.3333
NM_001001152	14151	60	19	22	33.6667
NM_001001178	196909	60	27	37	41.3333
NM_001001179	41785	97	30	29	52
NM_001001180	12502	19	10	3	10.6667
NM_001001182	226378	4557	2465	1752	2924.67
NM_001001183	23413	142	21	34	65.6667
NM_001001184	41607	279	44	28	117
NM_001001186	12180	27	11	13	17
NM_001001187	16072	106	52	55	71
NM_001001297	9286	20	1	0	7
NM_001001321	33021	2239	1907	2497	2214.33
NM_001001332	12668	27	12	13	17.3333
NM_001001333	18224	32	7	11	16.6667
NM_001001445	27174	27	0	5	10.6667
NM_001001446	24226	106	88	75	89.6667
NM_001001488	132022	2161	1006	1020	1395.67
NM_001001491	17838	197	192	164	184.333
NM_001001492	33852	32	3	1	12
NM_001001650	8682	763	556	530	616.333
NM_001001738	24704	5	2	11	6
NM_001001798	180692	36	28	18	27.3333
NM_001001881	45621	145	22	17	61.3333
NM_001001883	388161	37	20	27	28
NM_001001884	35715	12	12	12	12
NM_001001932	104856	2062	1235	1173	1490
NM_001001979	164378	18	7	14	13
NM_001001980	311320	50	31	55	45.3333
NM_001001983	125964	4197	2755	2568	3173.33
NM_001001984	80931	3176	1525	1454	2051.67
NM_001002004	28872	657	334	196	395.667
NM_001002008	21637	164	74	34	90.6667
NM_001002011	22205	17	1	2	6.66667
NM_001002268	142452	47	23	23	31
NM_001002764	238577	6668	1812	1531	3337
NM_001002786	13921	11	10	5	8.66667
NM_001002896	55405	11	2	5	6
NM_001002898	54601	22	14	10	15.3333
NM_001002929	19481	157	74	43	91.3333
NM_001003666	13962	66	13	19	32.6667
NM_001003817	25233	9	9	10	9.33333
NM_001003893	12937	2551	396	440	1129
NM_001003908	62840	1826	1145	1402	1457.67
NM_001003910	71033	86	10	9	35
NM_001003912	119283	2991	1290	855	1712
NM_001003918	49621	1174	1011	1123	1102.67
NM_001003920	25070	3	0	3	2
NM_001003948	248353	28512	14785	28269	23855.3
NM_001003950	44597	833	546	486	621.667
NM_001003951	36495	21	3	5	9.66667
NM_001003953	118424	440	107	49	198.667
NM_001004062	57216	644	232	78	318
NM_001004139	22650	76	43	35	51.3333
NM_001004141	54172	108	19	51	59.3333
NM_001004142	53508	16	4	8	9.33333
NM_001004143	23279	176	177	190	181
NM_001004144	14363	55	37	15	35.6667
NM_001004148	24611	100	7	3	36.6667
NM_001004149	62210	27	19	35	27
NM_001004157	13040	471	51	33	185
NM_001004158	20247	18	7	11	12
NM_001004164	67918	306	33	12	117
NM_001004173	109941	20	5	6	10.3333
NM_001004176	417394	4555	329	230	1704.67
NM_001004178	8455	108	6	12	42
NM_001004180	44968	348	9	12	123
NM_001004182	138101	11	1	4	5.33333
NM_001004184	55618	57	14	18	29.6667
NM_001004185	25545	1554	812	1008	1124.67
NM_001004190	40023	197	163	137	165.667
NM_001004194	61086	176	191	40	135.667
NM_001004357	2241311	737	310	331	459.333
NM_001004362	33227	526	247	291	354.667
NM_001004363	69153	173	21	25	73
NM_001004721	79173	859	119	91	356.333
NM_001004761	462976	193	61	58	104
NM_001005223	5402	32	8	6	15.3333
NM_001005341	57338	1149	148	190	495.667
NM_001005421	29349	11	3	2	5.33333
NM_001005423	53075	1274	212	332	606
NM_001005426	34820	55	6	11	24
NM_001005508	21280	23	4	5	10.6667
NM_001005509	31681	396	181	214	263.667
NM_001005510	292611	3910	813	283	1668.67
NM_001005767	22542	307	181	191	226.333
NM_001005788	21565	71	25	33	43
NM_001005854	76215	51	18	14	27.6667
NM_001005858	5445	6	12	28	15.3333
NM_001005860	34055	28	9	10	15.6667
NM_001005863	142815	3720	2369	4116	3401.67
NM_001005867	11038	4	7	2	4.33333
NM_001007567	10496	225	70	77	124
NM_001007568	19295	42	15	5	20.6667
NM_001007570	27942	2743	366	318	1142.33
NM_001007575	10356	90	53	43	62
NM_001007576	117648	37	10	15	20.6667
NM_001007577	10664	8	14	16	12.6667
NM_001007580	65187	12	1	1	4.66667
NM_001007589	16294	591	351	426	456
NM_001008231	108316	32	31	34	32.3333
NM_001008232	40209	956	259	177	464
NM_001008419	100939	51	15	25	30.3333
NM_001008420	478082	154	47	64	88.3333
NM_001008421	81603	762	563	725	683.333
NM_001008422	13300	357	160	114	210.333
NM_001008427	32611	856	248	181	428.333
NM_001008498	17322	144	26	6	58.6667
NM_001008501	17896	182	53	38	91
NM_001008542	65305	119	31	10	53.3333
NM_001008549	13092	48	6	4	19.3333
NM_001008550	63936	1203	662	676	847
NM_001008700	27193	264	78	105	149
NM_001008702	140921	17	3	6	8.66667
NM_001008705	7703	12	15	12	13
NM_001009947	187731	57	30	26	37.6667
NM_001009949	12843	844	377	839	686.667
NM_001009951	19045	479	275	353	369
NM_001010833	18173	38	3	4	15
NM_001010836	17318	79	12	1	30.6667
NM_001011707	72859	90	30	32	50.6667
NM_001011873	32953	1698	1077	852	1209
NM_001011874	457017	126	33	40	66.3333
NM_001012305	106580	32	16	10	19.3333
NM_001012309	34146	535	349	487	457
NM_001012310	5687	1709	3350	2897	2652
NM_001012324	27980	21	2	4	9
NM_001012330	6104	48	50	41	46.3333
NM_001012400	7587	187	52	52	97
NM_001012402	5682	11	1	0	4
NM_001012451	146792	17	38	25	26.6667
NM_001012765	148914	79	16	21	38.6667
NM_001013012	24483	918	390	376	561.333
NM_001013024	117632	15	6	9	10
NM_001013025	51354	803	354	390	515.667
NM_001013026	30804	69	10	5	28
NM_001013028	15121	71	11	9	30.3333
NM_001013366	30406	615	51	64	243.333
NM_001013367	38039	438	138	122	232.667
NM_001013368	14613	192	86	39	105.667
NM_001013371	12513	300	103	231	211.333
NM_001013375	26524	245	168	195	202.667
NM_001013379	21494	170	56	50	92
NM_001013380	25374	414	262	221	299
NM_001013381	9410	160	9	8	59
NM_001013389	28023	597	318	323	412.667
NM_001013405	30786	530	280	242	350.667
NM_001013411	1200597	112	40	64	72
NM_001013577	14209	75	55	32	54
NM_001013608	84982	196	155	176	175.667
NM_001013616	16358	8	20	20	16
NM_001013753	93498	13	7	5	8.33333
NM_001013757	39355	13	2	6	7
NM_001013764	27978	16	1	6	7.66667
NM_001013767	29106	76	12	25	37.6667
NM_001013769	10317	45	9	4	19.3333
NM_001013770	35152	32	9	11	17.3333
NM_001013771	118246	26	7	14	15.6667
NM_001013773	25972	12	2	1	5
NM_001013776	24944	18	7	3	9.33333
NM_001013778	26792	63	21	16	33.3333
NM_001013779	45433	18	14	14	15.3333
NM_001013780	5010	49	2	3	18
NM_001013785	14620	1453	763	381	865.667
NM_001013786	11553	66	28	18	37.3333
NM_001013792	24773	1137	1318	1660	1371.67
NM_001013799	10599	43	17	18	26
NM_001013802	1994621	1060	171	200	477
NM_001013806	59372	1980	1446	2593	2006.33
NM_001013811	89254	5095	888	1374	2452.33
NM_001013813	89545	25	10	20	18.3333
NM_001013816	110164	15	7	9	10.3333
NM_001013817	44334	47	11	15	24.3333
NM_001013820	69774	4333	2031	3489	3284.33
NM_001013829	20027	312	97	13	140.667
NM_001013833	1200547	65	26	42	44.3333
NM_001014390	9555	305	107	111	174.333
NM_001014395	25886	17	5	2	8
NM_001014397	31925	60	14	25	33
NM_001014398	13309	16	0	1	5.66667
NM_001014900	31216	85	16	14	38.3333
NM_001014973	100289	3039	2105	3079	2741
NM_001014974	36220	933	271	221	475
NM_001014976	28064	12	4	4	6.66667
NM_001014981	281065	4398	1152	850	2133.33
NM_001014996	45086	201	58	42	100.333
NM_001015039	93431	15	11	12	12.6667
NM_001015046	206676	32	26	33	30.3333
NM_001015507	59017	1252	561	612	808.333
NM_001015681	128093	399	75	28	167.333
NM_001015876	84531	466	68	42	192
NM_001017426	15158	224	73	76	124.333
NM_001017427	76024	17	12	8	12.3333
NM_001017429	5765	95	72	36	67.6667
NM_001017966	39857	7980	5662	9011	7551
NM_001017968	26438	407	155	111	224.333
NM_001017985	97927	762	251	263	425.333
NM_001018019	134564	53	23	26	34
NM_001018042	44015	24	6	3	11
NM_001024136	41618	17	3	4	8
NM_001024205	31828	1078	608	506	730.667
NM_001024230	14731	4	1	5	3.33333
NM_001024385	20103	16	7	12	11.6667
NM_001024560	15212	143	22	9	58
NM_001024602	24418	373	198	177	249.333
NM_001024604	130401	3350	1092	1400	1947.33
NM_001024606	5382	35	11	25	23.6667
NM_001024614	472716	120	46	50	72
NM_001024616	25429	958	484	479	640.333
NM_001024622	14210	508	351	373	410.667
NM_001024624	210374	1612	373	269	751.333
NM_001024672	31236	82	8	7	32.3333
NM_001024703	228766	3435	2049	1926	2470
NM_001024707	14468	164	88	48	100
NM_001024719	40184	1164	5077	6810	4350.33
NM_001024720	430934	84	46	59	63
NM_001024726	20241	59	18	5	27.3333
NM_001024728	16779	49	16	10	25
NM_001024731	13404	52	23	14	29.6667
NM_001024806	18068	207	148	164	173
NM_001024848	25252	96	36	28	53.3333
NM_001024849	11346	104	33	17	51.3333
NM_001024910	80221	101	6	7	38
NM_001024917	63264	1375	318	321	671.333
NM_001024918	150489	24	0	5	9.66667
NM_001024919	6713	42	30	18	30
NM_001024920	5175	24	6	4	11.3333
NM_001024922	9587	85	55	40	60
NM_001024926	18608	227	81	65	124.333
NM_001024928	21304	52	8	1	20.3333
NM_001024932	5930	1	4	1	2
NM_001024950	21338	152	72	62	95.3333
NM_001024952	68566	1588	977	1265	1276.67
NM_001024954	39589	134	20	5	53
NM_001025102	11869	93	44	26	54.3333
NM_001025103	5509	1	15	4	6.66667
NM_001025246	14174	6	8	6	6.66667
NM_001025311	21101	19	6	1	8.66667
NM_001025362	48977	37	3	6	15.3333
NM_001025365	7942	98	15	19	44
NM_001025371	5588	124	40	33	65.6667
NM_001025373	31808	615	343	342	433.333
NM_001025381	6638	127	14	18	53
NM_001025382	107819	35	24	30	29.6667
NM_001025431	30839	212	70	22	101.333
NM_001025432	129357	5394	3190	3505	4029.67
NM_001025559	567873	19	7	13	13
NM_001025572	109546	1304	864	740	969.333
NM_001025575	48408	5737	5833	10254	7274.67
NM_001025576	160730	2536	623	354	1171
NM_001025581	195182	63	21	18	34
NM_001025582	27544	33	2	3	12.6667
NM_001025602	25786	18	10	4	10.6667
NM_001025605	6681	18	3	1	7.33333
NM_001026211	24075	1267	523	571	787
NM_001029842	22741	3	2	5	3.33333
NM_001029856	46392	123	49	56	76
NM_001029867	26629	7714	4188	4867	5589.67
NM_001029872	31558	6	5	2	4.33333
NM_001029876	25032	126	69	55	83.3333
NM_001029877	39432	37	18	13	22.6667
NM_001029889	54070	1678	559	331	856
NM_001029912	111704	714	313	183	403.333
NM_001029934	155468	2457	1155	1112	1574.67
NM_001029979	21642	1329	991	693	1004.33
NM_001029982	39966	730	505	590	608.333
NM_001029983	19471	153	80	60	97.6667
NM_001029985	25917	139	2	2	47.6667
NM_001029990	7027	199	37	35	90.3333
NM_001030014	8915	93	28	19	46.6667
NM_001030296	8889	10	1	3	4.66667
NM_001030297	57828	13	6	7	8.66667
NM_001030307	13923	90	26	15	43.6667
NM_001031621	82974	34	12	12	19.3333
NM_001031667	9593	312	162	139	204.333
NM_001031772	93583	31	7	18	18.6667
NM_001031811	376486	61	24	32	39
NM_001031814	112326	2727	1642	1769	2046
NM_001033041	38152	740	369	648	585.667
NM_001033043	122335	30	14	9	17.6667
NM_001033123	8727	62	17	19	32.6667
NM_001033128	19746	16	4	6	8.66667
NM_001033135	26052	895	450	524	623
NM_001033136	20037	440	127	97	221.333
NM_001033139	26563	162	44	15	73.6667
NM_001033142	9918	182	80	76	112.667
NM_001033145	20218	425	196	298	306.333
NM_001033148	21647	22	4	4	10
NM_001033155	41257	340	141	81	187.333
NM_001033156	18829	162	124	81	122.333
NM_001033159	10831	43	23	15	27
NM_001033161	6020	59	16	7	27.3333
NM_001033162	27366	22	10	12	14.6667
NM_001033165	20206	494	331	353	392.667
NM_001033167	166025	10753	7827	8162	8914
NM_001033171	10580	40	1	3	14.6667
NM_001033173	65233	358	227	128	237.667
NM_001033174	28271	688	292	279	419.667
NM_001033175	13216	55	10	8	24.3333
NM_001033178	37845	54	8	4	22
NM_001033184	48500	14	0	8	7.33333
NM_001033192	6252	112	69	66	82.3333
NM_001033194	43150	510	278	269	352.333
NM_001033196	27219	274	167	298	246.333
NM_001033201	33892	492	279	325	365.333
NM_001033202	22592	236	107	65	136
NM_001033207	54510	1745	146	158	683
NM_001033208	88014	24	13	28	21.6667
NM_001033209	36417	17	3	0	6.66667
NM_001033210	92638	26	12	11	16.3333
NM_001033213	220053	5308	1627	1142	2692.33
NM_001033215	35013	11	0	0	3.66667
NM_001033217	96778	630	211	161	334
NM_001033219	44454	60	13	11	28
NM_001033222	49697	838	450	564	617.333
NM_001033227	48018	116	42	7	55
NM_001033228	143884	1659	514	420	864.333
NM_001033231	6840	90	52	37	59.6667
NM_001033233	58581	20	9	6	11.6667
NM_001033236	5401	49	33	22	34.6667
NM_001033238	176498	2864	1076	1837	1925.67
NM_001033242	7415	69	34	18	40.3333
NM_001033243	20559	20	3	24	15.6667
NM_001033247	87630	16	6	16	12.6667
NM_001033258	155748	28	8	13	16.3333
NM_001033259	169709	3229	518	260	1335.67
NM_001033261	47813	2202	1300	1995	1832.33
NM_001033268	88612	3322	1965	1882	2389.67
NM_001033270	96919	778	331	146	418.333
NM_001033272	129852	5188	3864	2921	3991
NM_001033273	42252	658	225	91	324.667
NM_001033274	47185	1536	1072	907	1171.67
NM_001033276	39537	585	262	182	343
NM_001033277	19688	221	104	53	126
NM_001033281	111312	29	10	15	18
NM_001033284	30152	136	22	10	56
NM_001033286	13914	293	133	112	179.333
NM_001033288	38861	71	10	16	32.3333
NM_001033289	87174	17	7	9	11
NM_001033291	63431	20	4	2	8.66667
NM_001033292	26229	48	3	5	18.6667
NM_001033294	65170	694	341	305	446.667
NM_001033296	159853	77	19	37	44.3333
NM_001033298	114201	912	214	176	434
NM_001033300	42936	593	304	365	420.667
NM_001033303	25707	18	1	3	7.33333
NM_001033305	8831	90	41	58	63
NM_001033306	107553	10423	3294	6736	6817.67
NM_001033308	14008	4	3	10	5.66667
NM_001033311	35741	20	11	8	13
NM_001033312	23450	242	74	58	124.667
NM_001033313	11320	102	91	68	87
NM_001033314	19521	243	31	20	98
NM_001033318	58855	666	195	191	350.667
NM_001033322	373439	180	66	100	115.333
NM_001033324	181649	2235	1531	561	1442.33
NM_001033328	16988	45	32	33	36.6667
NM_001033330	1105928	129	58	48	78.3333
NM_001033333	120335	27	8	4	13
NM_001033337	26519	905	88	56	349.667
NM_001033341	381803	7676	4493	3628	5265.67
NM_001033342	19196	240	27	16	94.3333
NM_001033343	28892	377	53	9	146.333
NM_001033347	267260	102	17	6	41.6667
NM_001033348	270706	15404	7461	6141	9668.67
NM_001033349	25116	30	4	12	15.3333
NM_001033352	8787	187	68	17	90.6667
NM_001033355	44328	2	12	3	5.66667
NM_001033365	52736	24	13	12	16.3333
NM_001033367	32814	27	18	12	19
NM_001033373	95463	33	10	4	15.6667
NM_001033375	52533	682	510	565	585.667
NM_001033378	36885	11	7	4	7.33333
NM_001033379	46362	222	48	29	99.6667
NM_001033385	214396	872	131	82	361.667
NM_001033391	111643	22	5	6	11
NM_001033393	59539	966	200	83	416.333
NM_001033399	108654	572	117	78	255.667
NM_001033409	118924	13	7	1	7
NM_001033411	16094	290	32	48	123.333
NM_001033420	502961	5705	1055	473	2411
NM_001033422	116908	2235	1175	1692	1700.67
NM_001033423	23055	10	3	3	5.33333
NM_001033430	70154	964	733	628	775
NM_001033431	28231	323	51	54	142.667
NM_001033432	47602	915	620	529	688
NM_001033434	80163	22	6	10	12.6667
NM_001033437	22930	50	59	54	54.3333
NM_001033441	6244	28	11	9	16
NM_001033442	62719	31	3	4	12.6667
NM_001033443	40285	62	21	7	30
NM_001033444	92833	17	6	8	10.3333
NM_001033445	172798	7902	4941	6913	6585.33
NM_001033447	72828	191	22	24	79
NM_001033457	17503	274	154	176	201.333
NM_001033463	13570	26	12	23	20.3333
NM_001033466	21035	210	98	67	125
NM_001033471	29840	18	5	5	9.33333
NM_001033472	60414	268	114	46	142.667
NM_001033475	33988	127	15	7	49.6667
NM_001033481	32478	415	295	157	289
NM_001033485	10596	309	52	68	143
NM_001033493	33243	21	5	3	9.66667
NM_001033496	7460	46	18	32	32
NM_001033500	172870	20	8	4	10.6667
NM_001033528	30592	552	379	342	424.333
NM_001033530	21017	609	144	147	300
NM_001033532	298302	1320	144	104	522.667
NM_001033535	42806	42	4	2	16
NM_001033536	90710	2866	1388	1265	1839.67
NM_001033537	11819	23	10	2	11.6667
NM_001033540	10288	40	6	7	17.6667
NM_001033541	127372	58	15	27	33.3333
NM_001033543	28755	326	41	27	131.333
NM_001033550	70415	55	37	29	40.3333
NM_001033621	21649	5	4	2	3.66667
NM_001033633	305571	45	17	27	29.6667
NM_001033634	73336	1253	607	457	772.333
NM_001033767	35744	8090	3535	7959	6528
NM_001033773	71279	164	3	5	57.3333
NM_001033775	7724	403	110	132	215
NM_001033779	36846	12	6	3	7
NM_001033780	6774	22	5	3	10
NM_001033785	18145	40	8	12	20
NM_001033786	17695	18	4	9	10.3333
NM_001033789	78819	228	12	6	82
NM_001033794	25967	16	3	4	7.66667
NM_001033795	433504	174	73	74	107
NM_001033813	13958	59	47	19	41.6667
NM_001033820	7343	9	4	6	6.33333
NM_001033874	113005	15	6	7	9.33333
NM_001033877	312891	107	22	15	48
NM_001033988	19969	338	143	231	237.333
NM_001034013	1088232	97	39	55	63.6667
NM_001034851	130399	20	21	23	21.3333
NM_001034858	103393	11	2	4	5.66667
NM_001034862	62763	285	124	106	171.667
NM_001034866	21099	383	39	30	150.667
NM_001034867	19332	36	9	1	15.3333
NM_001034868	20652	36	11	11	19.3333
NM_001034874	314402	52	14	22	29.3333
NM_001034885	31898	5	4	18	9
NM_001034893	14522	14	3	2	6.33333
NM_001034895	18961	87	10	9	35.3333
NM_001034899	56857	60	21	31	37.3333
NM_001034903	11971	35	11	7	17.6667
NM_001034906	7784	46	2	0	16
NM_001034907	216293	170	87	80	112.333
NM_001034909	15685	74	38	27	46.3333
NM_001035228	56963	3	4	3	3.33333
NM_001035231	14512	64	61	73	66
NM_001035525	116140	12	6	5	7.66667
NM_001036293	18593	458	365	673	498.667
NM_001037298	69632	169	56	34	86.3333
NM_001037321	13064	8	1	10	6.33333
NM_001037709	45111	1314	542	639	831.667
NM_001037712	25862	26	16	20	20.6667
NM_001037717	67198	552	140	102	264.667
NM_001037725	72343	341	107	83	177
NM_001037745	13929	23	3	1	9
NM_001037747	7236	27	8	1	12
NM_001037748	324734	15	4	6	8.33333
NM_001037755	63691	318	51	34	134.333
NM_001037756	33370	419	57	32	169.333
NM_001037859	25568	26	9	25	20
NM_001037865	194810	45	12	18	25
NM_001037906	887940	243	95	91	143
NM_001037922	21699	16	6	5	9
NM_001037925	8450	3	8	2	4.33333
NM_001037927	42788	251	6	8	88.3333
NM_001037928	20763	11	0	2	4.33333
NM_001037932	19116	156	21	46	74.3333
NM_001037938	11583	210	44	32	95.3333
NM_001037940	50581	1160	223	197	526.667
NM_001037997	275516	124	28	20	57.3333
NM_001038492	8161	24	3	4	10.3333
NM_001038587	38434	36	11	2	16.3333
NM_001038589	36535	12	3	2	5.66667
NM_001038635	31769	112	48	75	78.3333
NM_001038643	279363	16	2	5	7.66667
NM_001038651	21264	154	36	60	83.3333
NM_001038845	47522	3	4	2	3
NM_001039039	17894	358	27	23	136
NM_001039048	14510	2	1	2	1.66667
NM_001039061	38586	284	89	69	147.333
NM_001039080	50828	12	5	6	7.66667
NM_001039088	20612	38	15	20	24.3333
NM_001039094	754671	24	13	12	16.3333
NM_001039095	21870	28	13	12	17.6667
NM_001039104	115925	23	4	9	12
NM_001039173	468002	184	71	86	113.667
NM_001039184	128292	2501	694	532	1242.33
NM_001039189	419953	51	27	17	31.6667
NM_001039198	30390	547	184	86	272.333
NM_001039209	337555	2154	344	311	936.333
NM_001039214	19874	126	125	87	112.667
NM_001039231	46901	655	207	200	354
NM_001039239	44047	69	21	27	39
NM_001039371	68683	334	63	71	156
NM_001039388	68771	5	7	6	6
NM_001039472	46614	12	4	3	6.33333
NM_001039478	51590	139	18	29	62
NM_001039482	43102	345	167	131	214.333
NM_001039483	25309	214	93	97	134.667
NM_001039485	376971	70	31	33	44.6667
NM_001039493	167704	117	30	31	59.3333
NM_001039509	68659	620	151	108	293
NM_001039512	19948	46	19	11	25.3333
NM_001039521	34143	453	288	286	342.333
NM_001039522	24909	85	38	17	46.6667
NM_001039530	38505	556	296	463	438.333
NM_001039534	16693	236	50	28	104.667
NM_001039536	55441	333	45	43	140.333
NM_001039546	146696	4217	1515	1034	2255.33
NM_001039552	22621	310	104	131	181.667
NM_001039554	5183	83	48	25	52
NM_001039555	52266	818	7137	5358	4437.67
NM_001039556	56889	35	6	5	15.3333
NM_001039557	71002	23	3	8	11.3333
NM_001039560	8284	293	98	98	163
NM_001039586	5279	70	53	33	52
NM_001039646	23835	92	136	279	169
NM_001039678	7457	63	73	31	55.6667
NM_001039684	10455	22	5	1	9.33333
NM_001039723	41171	167	20	6	64.3333
NM_001039889	13410	14	5	11	10
NM_001039939	57869	2365	1599	1498	1820.67
NM_001040026	14771	99	62	40	67
NM_001040111	64518	417	139	62	206
NM_001040396	16889	399	290	402	363.667
NM_001040397	219528	1227	655	390	757.333
NM_001040398	26438	658	214	141	337.667
NM_001040399	27163	1365	505	615	828.333
NM_001040426	544105	72	41	57	56.6667
NM_001040459	237423	19	6	10	11.6667
NM_001040695	35303	248	71	40	119.667
NM_001040696	77632	31	12	15	19.3333
NM_001040699	84634	351	146	329	275.333
NM_001042407	5377	123	38	29	63.3333
NM_001042421	71868	90	21	26	45.6667
NM_001042499	32492	404	184	412	333.333
NM_001042501	26714	310	246	317	291
NM_001042523	63774	39	15	17	23.6667
NM_001042541	33795	2682	593	414	1229.67
NM_001042591	12622	3309	3195	1161	2555
NM_001042592	12245	9	26	60	31.6667
NM_001042653	8974	13	3	1	5.66667
NM_001042655	8304	201	139	114	151.333
NM_001042660	28570	558	168	227	317.667
NM_001042670	5285	17	9	12	12.6667
NM_001042673	127037	182	20	15	72.3333
NM_001042714	55027	16	5	3	8
NM_001042767	16445	38	27	23	29.3333
NM_001044380	22031	101	85	47	77.6667
NM_001044389	36399	0	5	2	2.33333
NM_001045513	83581	3763	4008	6610	4793.67
NM_001045516	12372	66	10	23	33
NM_001045523	22910	193	123	32	116
NM_001045524	57662	20	2	6	9.33333
NM_001045526	21630	8	0	6	4.66667
NM_001045527	42379	124	13	18	51.6667
NM_001045528	60207	1777	1000	1454	1410.33
NM_001045529	43953	958	453	467	626
NM_001045530	58251	9	1	1	3.66667
NM_001045531	16304	30	18	15	21
NM_001045536	130895	2437	1182	1236	1618.33
NM_001045540	22527	5	1	4	3.33333
NM_001045543	10421	31	6	14	17
NM_001045559	12319	124	62	77	87.6667
NM_001045807	7180	778	266	240	428
NM_001048054	77161	132	188	192	170.667
NM_001048168	74145	16	17	11	14.6667
NM_001048176	96498	426	41	59	175.333
NM_001048204	14793	26	12	9	15.6667
NM_001048208	86603	100	13	16	43
NM_001076679	35752	24	10	15	16.3333
NM_001076681	17305	49	4	4	19
NM_001076789	48271	541	190	122	284.333
NM_001076791	12741	139	61	63	87.6667
NM_001077354	123683	44	25	23	30.6667
NM_001077364	60994	2288	650	483	1140.33
NM_001077425	895538	162	57	73	97.3333
NM_001077495	87457	4297	1769	1943	2669.67
NM_001077514	132102	88	20	47	51.6667
NM_001077661	48960	379	62	65	168.667
NM_001077684	31430	36	8	4	16
NM_001077705	18003	44	12	3	19.6667
NM_001077707	65844	177	59	53	96.3333
NM_001077712	127775	36	31	28	31.6667
NM_001077713	83203	1178	271	192	547
NM_001079513	7254	7	6	9	7.33333
NM_001079824	9186	413	116	170	233
NM_001079869	24805	10	13	17	13.3333
NM_001079931	25834	20	4	6	10
NM_001080548	121064	507	577	1355	813
NM_001080706	87979	1584	1068	1367	1339.67
NM_001080708	29808	14	10	32	18.6667
NM_001080712	12201	32	3	6	13.6667
NM_001080769	43534	488	160	97	248.333
NM_001080776	28726	23	4	5	10.6667
NM_001080793	31694	12	4	4	6.66667
NM_001080808	82274	16	9	3	9.33333
NM_001080809	108241	36053	44221	70545	50273
NM_001080814	468039	37	9	10	18.6667
NM_001080816	15977	11	1	1	4.33333
NM_001080817	63437	686	256	225	389
NM_001080819	74604	3360	1711	1459	2176.67
NM_001080924	168519	3698	1864	2116	2559.33
NM_001080925	16221	13	0	1	4.66667
NM_001080928	101667	16	7	7	10
NM_001080929	14217	9	7	16	10.6667
NM_001080930	11289	46	29	21	32
NM_001080931	91811	2494	1844	2588	2308.67
NM_001080932	49910	1369	555	360	761.333
NM_001080934	11926	130	131	187	149.333
NM_001080941	10440	15	12	1	9.33333
NM_001080944	170581	82	25	37	48
NM_001080949	20112	111	46	29	62
NM_001080977	58799	1451	789	866	1035.33
NM_001080981	17383	248	158	184	196.667
NM_001080995	16706	20	18	33	23.6667
NM_001081006	520623	140	44	58	80.6667
NM_001081007	13085	15	9	5	9.66667
NM_001081009	170693	44	20	43	35.6667
NM_001081011	242111	3430	1390	1477	2099
NM_001081012	339126	3813	231	194	1412.67
NM_001081016	51422	444	252	111	269
NM_001081017	235139	36	10	14	20
NM_001081019	6670	110	70	79	86.3333
NM_001081021	19358	302	80	71	151
NM_001081022	166922	1152	116	110	459.333
NM_001081027	364005	237	121	458	272
NM_001081028	185083	1729	257	124	703.333
NM_001081029	18247	1400	292	444	712
NM_001081033	347522	66	11	21	32.6667
NM_001081035	316781	53	22	43	39.3333
NM_001081040	6941	197	49	43	96.3333
NM_001081041	9346	72	30	27	43
NM_001081043	23122	189	114	59	120.667
NM_001081045	109063	6482	4531	6474	5829
NM_001081046	25319	11	4	3	6
NM_001081048	20215	245	55	60	120
NM_001081049	77920	1465	1120	890	1158.33
NM_001081050	1003461	7228	1072	665	2988.33
NM_001081054	27547	130	21	22	57.6667
NM_001081055	57917	897	444	418	586.333
NM_001081056	38937	1418	707	718	947.667
NM_001081059	21786	315	140	90	181.667
NM_001081061	86077	1100	757	841	899.333
NM_001081064	235503	115	57	58	76.6667
NM_001081065	6681	9	22	10	13.6667
NM_001081066	59683	211	29	28	89.3333
NM_001081068	55956	831	457	570	619.333
NM_001081073	23940	73	36	40	49.6667
NM_001081074	80646	13706	6620	9173	9833
NM_001081075	35654	662	169	179	336.667
NM_001081077	27240	363	265	247	291.667
NM_001081078	43563	11	1	4	5.33333
NM_001081079	16752	45	37	15	32.3333
NM_001081080	60915	1689	1201	1484	1458
NM_001081081	69783	58	20	39	39
NM_001081084	215539	73	5	9	29
NM_001081086	30972	465	251	343	353
NM_001081087	14120	22	5	0	9
NM_001081088	161733	34	13	68	38.3333
NM_001081089	10894	37	17	9	21
NM_001081090	50678	389	272	280	313.667
NM_001081091	62026	499	147	176	274
NM_001081092	64501	1472	754	585	937
NM_001081096	113606	58	20	23	33.6667
NM_001081097	223343	633	425	291	449.667
NM_001081098	33028	338	158	80	192
NM_001081099	12924	12	1	4	5.66667
NM_001081100	58931	582	46	31	219.667
NM_001081101	41059	534	149	143	275.333
NM_001081103	122535	2283	1493	1785	1853.67
NM_001081105	33132	6	6	17	9.66667
NM_001081107	36453	198	60	12	90
NM_001081109	87769	729	352	241	440.667
NM_001081111	27175	355	209	212	258.667
NM_001081112	59693	227	48	32	102.333
NM_001081113	60784	1036	704	434	724.667
NM_001081114	16615	11	0	2	4.33333
NM_001081116	62416	18	14	20	17.3333
NM_001081118	33964	633	493	489	538.333
NM_001081120	11553	108	16	6	43.3333
NM_001081121	69264	17	2	5	8
NM_001081125	219559	8	6	13	9
NM_001081127	76327	22	4	10	12
NM_001081128	71574	820	101	68	329.667
NM_001081129	166298	51	27	21	33
NM_001081131	44733	5214	891	771	2292
NM_001081132	105235	1447	941	1096	1161.33
NM_001081133	283120	2649	669	429	1249
NM_001081137	78307	20	7	10	12.3333
NM_001081141	327817	2923	2220	718	1953.67
NM_001081142	49704	4	4	5	4.33333
NM_001081143	57099	10	2	2	4.66667
NM_001081146	335293	23	8	9	13.3333
NM_001081149	83724	2243	1463	2076	1927.33
NM_001081150	33453	335	71	130	178.667
NM_001081151	47052	537	130	64	243.667
NM_001081152	38581	345	140	177	220.667
NM_001081153	454144	109	34	40	61
NM_001081154	50109	2247	930	1039	1405.33
NM_001081157	14253	10	1	1	4
NM_001081158	21353	1020	430	461	637
NM_001081160	59925	11	0	2	4.33333
NM_001081162	13412	10	7	3	6.66667
NM_001081163	64284	184	80	46	103.333
NM_001081168	8979	100	44	21	55
NM_001081169	20891	3369	1057	643	1689.67
NM_001081171	49487	16	3	11	10
NM_001081172	101031	16	7	2	8.33333
NM_001081173	82388	16	7	7	10
NM_001081175	93184	122	85	123	110
NM_001081176	37177	265	51	20	112
NM_001081177	153766	5487	2043	2889	3473
NM_001081178	70092	90	69	63	74
NM_001081179	82476	526	120	79	241.667
NM_001081180	59247	15	38	104	52.3333
NM_001081181	9411	100	91	116	102.333
NM_001081182	23852	7	12	4	7.66667
NM_001081184	316382	1874	260	191	775
NM_001081188	22899	297	137	89	174.333
NM_001081189	23481	24	9	6	13
NM_001081190	54358	18	7	1	8.66667
NM_001081191	114881	1541	192	149	627.333
NM_001081193	55920	1710	1021	1090	1273.67
NM_001081195	83385	1778	959	1341	1359.33
NM_001081196	14742	450	239	268	319
NM_001081198	49667	5	0	3	2.66667
NM_001081199	8202	68	42	34	48
NM_001081201	57053	597	245	129	323.667
NM_001081203	57213	1212	753	769	911.333
NM_001081204	84343	110	14	15	46.3333
NM_001081205	23283	101	321	281	234.333
NM_001081210	5428	20	5	10	11.6667
NM_001081212	21467	1214	710	1032	985.333
NM_001081213	38538	517	44	39	200
NM_001081216	109331	1550	757	664	990.333
NM_001081217	11658	52	10	4	22
NM_001081218	42386	857	445	536	612.667
NM_001081220	19965	10	3	6	6.33333
NM_001081221	67469	1415	924	863	1067.33
NM_001081222	43841	820	540	566	642
NM_001081224	186744	18996	7277	3748	10007
NM_001081225	52669	782	321	267	456.667
NM_001081230	37197	12	0	2	4.66667
NM_001081232	95536	3424	1176	1450	2016.67
NM_001081235	38860	2311	758	512	1193.67
NM_001081236	17888	160	76	104	113.333
NM_001081237	21704	130	45	25	66.6667
NM_001081239	5710	7	0	3	3.33333
NM_001081240	31942	356	162	137	218.333
NM_001081241	16990	200	84	38	107.333
NM_001081242	342619	1531	67	80	559.333
NM_001081243	162321	49	15	28	30.6667
NM_001081247	38353	751	402	396	516.333
NM_001081251	102455	2077	1408	2033	1839.33
NM_001081252	114450	104	24	30	52.6667
NM_001081256	62363	1614	837	751	1067.33
NM_001081257	599761	178	49	65	97.3333
NM_001081260	22589	910	294	218	474
NM_001081262	20908	11	6	13	10
NM_001081263	298285	63	27	31	40.3333
NM_001081264	47831	484	93	50	209
NM_001081265	36283	321	164	104	196.333
NM_001081266	7606	90	30	19	46.3333
NM_001081267	112887	1862	1326	1508	1565.33
NM_001081268	5527	90	27	23	46.6667
NM_001081269	79091	1610	1532	784	1308.67
NM_001081270	323421	18	7	4	9.66667
NM_001081274	16723	95	78	16	63
NM_001081275	5307	33	0	0	11
NM_001081277	205326	94	22	37	51
NM_001081278	166832	516	32	53	200.333
NM_001081279	91652	2582	1409	594	1528.33
NM_001081281	47140	10	2	5	5.66667
NM_001081282	61975	1594	443	440	825.667
NM_001081283	25277	63	0	1	21.3333
NM_001081286	102050	958	853	1410	1073.67
NM_001081287	278902	261	17	10	96
NM_001081288	57024	724	667	538	643
NM_001081290	68772	1354	1054	1281	1229.67
NM_001081293	59081	1442	892	1031	1121.67
NM_001081295	123445	4017	3818	3529	3788
NM_001081298	139050	2937	7409	8596	6314
NM_001081299	437956	444	56	81	193.667
NM_001081300	74936	2783	1298	1158	1746.33
NM_001081302	295200	5060	4386	3675	4373.67
NM_001081304	163315	4660	1969	2859	3162.67
NM_001081307	189998	1652	291	149	697.333
NM_001081309	44661	309	142	183	211.333
NM_001081310	47470	75	19	35	43
NM_001081315	37664	576	126	73	258.333
NM_001081318	36550	63	1592	3348	1667.67
NM_001081319	83640	2304	960	1415	1559.67
NM_001081321	82597	2420	1340	1596	1785.33
NM_001081324	54422	186	28	59	91
NM_001081326	68168	1340	1261	734	1111.67
NM_001081327	109473	15	3	4	7.33333
NM_001081328	235997	9391	6006	2712	6036.33
NM_001081330	128300	30	10	14	18
NM_001081332	21624	10	1	1	4
NM_001081335	45780	254	46	39	113
NM_001081336	155481	382	98	53	177.667
NM_001081337	74648	709	70	15	264.667
NM_001081340	86037	2398	1481	2248	2042.33
NM_001081341	388233	1471	299	217	662.333
NM_001081343	34599	449	177	250	292
NM_001081344	145494	1431	527	341	766.333
NM_001081345	115095	6528	3297	4600	4808.33
NM_001081348	296789	120	28	37	61.6667
NM_001081351	269697	11120	1245	1471	4612
NM_001081352	89250	1096	466	617	726.333
NM_001081355	105319	814	426	261	500.333
NM_001081362	90982	1396	349	168	637.667
NM_001081365	44747	184	47	19	83.3333
NM_001081371	132477	2995	1726	1812	2177.67
NM_001081372	23291	2934	1102	879	1638.33
NM_001081373	61693	663	78	25	255.333
NM_001081378	84766	1571	430	440	813.667
NM_001081381	16911	147	40	44	77
NM_001081383	226990	5738	2913	3619	4090
NM_001081386	88178	28	13	7	16
NM_001081387	25917	1001	68	157	408.667
NM_001081391	1211352	174	64	82	106.667
NM_001081392	118099	585	329	281	398.333
NM_001081393	209669	81	17	35	44.3333
NM_001081394	24022	18	1	2	7
NM_001081395	73034	38	26	43	35.6667
NM_001081396	57870	140	11	10	53.6667
NM_001081400	28825	3682	2163	2197	2680.67
NM_001081402	226155	1544	556	501	867
NM_001081403	101992	12	1	2	5
NM_001081408	12589	2330	659	651	1213.33
NM_001081409	67684	2137	1301	1731	1723
NM_001081411	115810	920	119	164	401
NM_001081412	124028	2507	647	700	1284.67
NM_001081418	28234	481	190	179	283.333
NM_001081419	82243	101	17	16	44.6667
NM_001081426	392402	10632	5020	2599	6083.67
NM_001081428	117765	189	12	15	72
NM_001081429	72558	387	29	43	153
NM_001081431	8127	121	44	48	71
NM_001081432	202668	49	13	14	25.3333
NM_001081433	281048	468	126	164	252.667
NM_001081435	29848	40	16	13	23
NM_001081436	66467	9	12	7	9.33333
NM_001081446	116878	45	8	14	22.3333
NM_001081454	16243	150	54	8	70.6667
NM_001081471	5241	74	12	7	31
NM_001081477	92148	843	384	402	543
NM_001081490	27566	54	32	13	33
NM_001081499	69223	576	262	246	361.333
NM_001081549	74219	801	124	59	328
NM_001081557	802246	689	87	83	286.333
NM_001081564	5614	42	1	0	14.3333
NM_001081642	8163	12	0	0	4
NM_001081653	640773	197	66	81	114.667
NM_001081665	141581	17	5	8	10
NM_001081678	21671	298	118	148	188
NM_001081687	58263	51	13	11	25
NM_001081688	19679	7	10	7	8
NM_001081746	14152	2	6	14	7.33333
NM_001081750	25926	160	127	99	128.667
NM_001081956	37232	242	35	11	96
NM_001081963	47941	74	31	24	43
NM_001081975	12358	106	56	81	81
NM_001081978	11096	26	4	2	10.6667
NM_001082412	57187	148	82	70	100
NM_001082414	46088	1996	493	216	901.667
NM_001082483	76362	23	6	5	11.3333
NM_001082484	85175	33	11	6	16.6667
NM_001082536	178477	1210	411	121	580.667
NM_001082553	162475	19	7	5	10.3333
NM_001083587	232884	3684	1755	723	2054
NM_001083628	237763	202	153	53	136
NM_001083891	11211	33	12	6	17
NM_001083905	21387	81	70	64	71.6667
NM_001083906	341132	13864	5530	4127	7840.33
NM_001083918	197849	942	109	348	466.333
NM_001083945	43641	268	32	39	113
NM_001085348	11342	18	6	9	11
NM_001085355	352583	14258	6388	6229	8958.33
NM_001085373	387123	42	14	18	24.6667
NM_001085376	245708	36	18	19	24.3333
NM_001085378	23065	13	3	4	6.66667
NM_001085385	14349	26	44	35	35
NM_001085390	12005	9	16	2	9
NM_001085393	9472	10	7	7	8
NM_001085409	44667	90	1	0	30.3333
NM_001085417	18134	431	72	51	184.667
NM_001085440	10763	94	55	56	68.3333
NM_001085492	340051	13634	6939	6231	8934.67
NM_001085493	25160	506	223	269	332.667
NM_001085495	92471	2069	358	192	873
NM_001085499	36248	11	2	11	8
NM_001085505	28256	15	5	1	7
NM_001085508	23697	25	0	2	9
NM_001085509	55853	14	3	3	6.66667
NM_001085513	15983	15	5	3	7.66667
NM_001085515	7475	29	17	27	24.3333
NM_001085518	43100	21	5	2	9.33333
NM_001085521	173610	17	10	5	10.6667
NM_001085546	6221	18	4	4	8.66667
NM_001085549	208375	36	9	16	20.3333
NM_001093749	19862	101	73	92	88.6667
NM_001093752	26147	159	121	249	176.333
NM_001097617	12016	24	24	12	20
NM_001097623	218517	34	21	28	27.6667
NM_001097644	34298	366	176	173	238.333
NM_001098233	31145	611	67	49	242.333
NM_001098404	46476	32	8	10	16.6667
NM_001098528	401763	181	138	176	165
NM_001098799	97649	15	4	5	8
NM_001099276	62677	90	30	27	49
NM_001099310	27556	14	5	3	7.33333
NM_001099327	13461	57	15	10	27.3333
NM_001099328	67297	3	3	5	3.66667
NM_001099331	10295	1208	4	3	405
NM_001099624	83365	25	10	18	17.6667
NM_001099628	130058	2244	1689	1860	1931
NM_001099633	337228	118	35	27	60
NM_001099637	73472	827	966	1369	1054
NM_001100109	34110	410	229	333	324
NM_001100180	45243	325	54	59	146
NM_001100181	21429	3455	491	703	1549.67
NM_001100185	18459	11	3	14	9.33333
NM_001100394	45824	17	5	9	10.3333
NM_001100449	117115	647	147	134	309.333
NM_001100451	30038	1260	561	687	836
NM_001100452	33298	360	120	91	190.333
NM_001100466	30802	22	7	7	12
NM_001101431	9030	58	19	36	37.6667
NM_001101433	57217	5432	2098	1264	2931.33
NM_001101445	22433	633	103	164	300
NM_001101467	7756	99	50	78	75.6667
NM_001101471	9261	54	9	11	24.6667
NM_001101475	9637	442	16	8	155.333
NM_001101478	19262	52	35	26	37.6667
NM_001101483	18898	10	3	2	5
NM_001101488	203993	42	30	38	36.6667
NM_001101519	37178	49	37	40	42
NM_001101531	22612	45	3	3	17
NM_001101534	79912	29	7	8	14.6667
NM_001101586	55439	21	11	10	14
NM_001101598	18664	3919	143	125	1395.67
NM_001102409	43250	201	142	138	160.333
NM_001102430	95164	2057	1301	1404	1587.33
NM_001102565	15762	444	321	366	377
NM_001102582	25264	10	2	1	4.33333
NM_001102607	138669	41	15	10	22
NM_001102611	57273	103	24	11	46
NM_001102613	17970	173	41	15	76.3333
NM_001103158	33741	48	2	6	18.6667
NM_001103181	133808	1962	1147	941	1350
NM_001103199	482358	898	184	211	431
NM_001103366	25559	33	8	10	17
NM_001104525	44110	205	1037	1043	761.667
NM_001104537	23197	11	0	6	5.66667
NM_001104539	30227	10	3	4	5.66667
NM_001104540	51587	32	9	8	16.3333
NM_001104551	32456	10	6	7	7.66667
NM_001104569	30348	11	0	8	6.33333
NM_001104573	25333	12	2	2	5.33333
NM_001104581	19923	15	7	2	8
NM_001104582	32332	24	10	18	17.3333
NM_001104616	41589	49	7	8	21.3333
NM_001104624	36040	30	4	13	15.6667
NM_001104627	34101	11	4	5	6.66667
NM_001104628	33375	25	6	6	12.3333
NM_001104634	32800	18	25	84	42.3333
NM_001104635	40899	25	10	33	22.6667
NM_001104637	40878	25	23	137	61.6667
NM_001104642	40189	30	6	5	13.6667
NM_001104644	25075	65	25	25	38.3333
NM_001104645	33286	25	13	18	18.6667
NM_001104646	7958	1	3	1	1.66667
NM_001104648	39108	30	14	15	19.6667
NM_001104927	62799	204	17	13	78
NM_001104946	30441	14	12	6	10.6667
NM_001105055	35790	31	15	14	20
NM_001105056	47190	50	60	35	48.3333
NM_001105057	79306	47	27	13	29
NM_001105058	40703	18	4	5	9
NM_001105060	30539	10	1	4	5
NM_001105067	33717	45	13	19	25.6667
NM_001105068	25810	15	2	6	7.66667
NM_001105070	22970	18	11	11	13.3333
NM_001105076	15936	23	0	0	7.66667
NM_001105151	24805	28	10	13	17
NM_001105152	25962	11	7	6	8
NM_001105160	34026	3931	748	1157	1945.33
NM_001105189	39829	16	7	3	8.66667
NM_001105190	41504	16	8	3	9
NM_001105201	7628	60	17	3	26.6667
NM_001105252	77789	6	2	2	3.33333
NM_001105557	16420	154	80	79	104.333
NM_001105667	9359	201	48	36	95
NM_001109661	168674	1948	1049	172	1056.33
NM_001109985	272354	1633	348	1007	996
NM_001110146	16754	231	81	65	125.667
NM_001110195	33496	11	12	6	9.66667
NM_001110208	47894	204	117	115	145.333
NM_001110218	267032	26	7	9	14
NM_001110227	10153	412	198	260	290
NM_001110253	62400	13	10	11	11.3333
NM_001110311	124778	435	98	53	195.333
NM_001110337	21086	82	40	6	42.6667
NM_001110351	56329	90	56	95	80.3333
NM_001110505	21799	28	28	23	26.3333
NM_001110506	27684	21	6	14	13.6667
NM_001110513	74543	15	8	10	11
NM_001110784	10803	12	1	5	6
NM_001110807	11930	20	1	5	8.66667
NM_001111016	651016	20	9	12	13.6667
NM_001111030	90306	20	11	9	13.3333
NM_001111048	7465	867	206	143	405.333
NM_001111099	9744	0	10	6	5.33333
NM_001111100	35159	0	14	10	8
NM_001111111	12473	251	141	74	155.333
NM_001111121	96080	1530	692	608	943.333
NM_001111141	5928	54	42	65	53.6667
NM_001111145	19318	129	26	29	61.3333
NM_001111277	67445	118	38	21	59
NM_001111279	59508	411	133	146	230
NM_001111296	41165	16	4	5	8.33333
NM_001111312	130218	33	33	28	31.3333
NM_001111314	97042	2559	920	1049	1509.33
NM_001111320	27864	117	62	51	76.6667
NM_001111324	177445	83	32	54	56.3333
NM_001112721	111527	5	7	0	4
NM_001112744	21426	63	7	6	25.3333
NM_001113198	214301	1618	133	74	608.333
NM_001113208	423591	36	0	2	12.6667
NM_001113238	64897	25	7	17	16.3333
NM_001113283	79416	4607	1879	3292	3259.33
NM_001113323	42871	11	4	8	7.66667
NM_001113354	113186	78	34	20	44
NM_001113356	10615	52	33	31	38.6667
NM_001113358	18445	80	47	76	67.6667
NM_001113373	247156	696	37	18	250.333
NM_001113408	12611	74	43	15	44
NM_001113412	369433	5026	450	210	1895.33
NM_001113417	377129	22823	16068	12469	17120
NM_001113418	71288	108	109	55	90.6667
NM_001113424	31136	844	616	1101	853.667
NM_001113470	21259	942	733	649	774.667
NM_001113486	162665	2206	505	196	969
NM_001113517	99048	343	303	84	243.333
NM_001113529	19422	15	10	17	14
NM_001113533	25461	303	180	195	226
NM_001113545	96989	3291	617	373	1427
NM_001113553	56561	17	15	7	13
NM_001113563	69855	1400	758	593	917
NM_001114088	15960	53	19	2	24.6667
NM_001114174	58270	14	6	9	9.66667
NM_001114332	108720	1626	151	179	652
NM_001114334	45797	715	243	327	428.333
NM_001114339	72520	269	84	97	150
NM_001114386	330071	903	461	227	530.333
NM_001114399	106104	1976	856	763	1198.33
NM_001114400	200504	44	20	16	26.6667
NM_001114541	6958	25	9	9	14.3333
NM_001114663	348340	380	122	197	233
NM_001114664	80970	199	49	16	88
NM_001114679	33232	17	2	11	10
NM_001115074	71692	22	3	9	11.3333
NM_001122594	76069	390	80	53	174.333
NM_001122603	49629	31	4	14	16.3333
NM_001122660	15598	32	1	3	12
NM_001122666	24316	19	4	7	10
NM_001122667	161049	1443	544	709	898.667
NM_001122676	43674	87	34	21	47.3333
NM_001122730	92783	836	126	98	353.333
NM_001122759	88214	336	98	52	162
NM_001122768	115247	17	10	6	11
NM_001122895	5786	7	17	3	9
NM_001122952	536934	214	84	113	137
NM_001122993	84058	16	7	7	10
NM_001123327	61904	978	427	330	578.333
NM_001123370	12714	298	113	138	183
NM_001123371	8609	13	28	55	32
NM_001123372	12610	307	115	147	189.667
NM_001126491	10903	12	19	11	14
NM_001127188	28407	13	3	6	7.33333
NM_001127189	55815	215	27	36	92.6667
NM_001127338	47204	99	54	37	63.3333
NM_001127346	106037	638	150	59	282.333
NM_001127349	66768	74	24	14	37.3333
NM_001127353	136612	78	26	27	43.6667
NM_001127376	12824	68	3	0	23.6667
NM_001127382	135406	156	47	42	81.6667
NM_001127725	36826	10	2	2	4.66667
NM_001128086	1099476	259	110	101	156.667
NM_001128092	104741	130	11	5	48.6667
NM_001128103	295044	60	34	16	36.6667
NM_001128151	104771	4885	3116	5729	4576.67
NM_001128601	31194	701	244	306	417
NM_001128605	29297	115	26	11	50.6667
NM_001128607	151887	503	200	106	269.667
NM_001128625	79623	43	7	11	20.3333
NM_001130166	413566	118	60	73	83.6667
NM_001130184	61131	12	0	3	5
NM_001130187	9802	231	77	76	128
NM_001130457	10470	27	15	11	17.6667
NM_001131054	6001	46	5	1	17.3333
NM_001131069	17178	26	24	22	24
NM_001134300	122511	15	13	6	11.3333
NM_001134384	150526	213	26	24	87.6667
NM_001134399	323580	114	50	24	62.6667
NM_001134457	55327	161	66	56	94.3333
NM_001134480	51153	7094	4125	6147	5788.67
NM_001134767	39207	237	45	68	116.667
NM_001134802	20400	32	6	6	14.6667
NM_001135001	124512	478	313	346	379
NM_001135115	6356	5	5	10	6.66667
NM_001135172	101018	25	15	22	20.6667
NM_001135559	98092	2191	1111	1394	1565.33
NM_001135577	26734	321	101	90	170.667
NM_001135727	348649	64	14	28	35.3333
NM_001136066	39889	439	80	51	190
NM_001136070	20265	42	16	14	24
NM_001136091	11084	11	2	1	4.66667
NM_001136104	90833	6	8	2	5.33333
NM_001136181	17347	54	15	16	28.3333
NM_001136227	16772	52	67	38	52.3333
NM_001136240	31467	3316	889	507	1570.67
NM_001136471	12754	51	36	17	34.6667
NM_001139509	16778	14	8	7	9.66667
NM_001142411	26776	40	12	10	20.6667
NM_001142642	86752	1814	503	264	860.333
NM_001142698	41655	51	4	8	21
NM_001142706	6141	7	16	11	11.3333
NM_001142781	116840	216	62	31	103
NM_001142804	187501	107	22	5	44.6667
NM_001142939	17981	323	137	128	196
NM_001142952	17657	57	14	3	24.6667
NM_001142953	118753	1275	248	182	568.333
NM_001142957	15146	135	125	143	134.333
NM_001142960	21923	32	5	3	13.3333
NM_001142963	18293	149	98	94	113.667
NM_001142968	7039	78	14	11	34.3333
NM_001143689	5058	188	54	45	95.6667
NM_001143802	56523	1256	89	62	469
NM_001143956	22240	15	2	8	8.33333
NM_001145096	54362	33	18	14	21.6667
NM_001145162	37066	26	89	36	50.3333
NM_001145164	7017	10	5	11	8.66667
NM_001145352	7535	56	6	0	20.6667
NM_001145433	11435	435	207	175	272.333
NM_001145452	81283	31	4	6	13.6667
NM_001145676	478144	1818	153	151	707.333
NM_001145820	133042	18	20	1	13
NM_001145824	68008	1	9	8	6
NM_001145958	43909	17	2	1	6.66667
NM_001145978	84180	1657	232	186	691.667
NM_001146022	225520	298	21	48	122.333
NM_001146043	43260	162	28	23	71
NM_001146180	140793	150	70	44	88
NM_001146199	60665	29	19	30	26
NM_001146325	15324	20	1	1	7.33333
NM_001146349	107839	2769	3265	3535	3189.67
NM_001159288	40877	533	244	223	333.333
NM_001159301	21946	7	11	18	12
NM_001159317	143443	47	7	44	32.6667
NM_001159329	7485	10	4	1	5
NM_001159361	180810	1479	480	182	713.667
NM_001159375	5488	5	0	2	2.33333
NM_001159393	8361	124	96	44	88
NM_001159487	8702	2	173	67	80.6667
NM_001159492	80243	3662	1859	1909	2476.67
NM_001159497	67252	44	25	12	27
NM_001159500	160512	7	0	2	3
NM_001159509	89000	1039	339	239	539
NM_001159517	112891	525	216	236	325.667
NM_001159519	22760	150	7	5	54
NM_001159558	107270	5	2	5	4
NM_001159564	124312	3	1	0	1.33333
NM_001159577	105800	41	11	11	21
NM_001159606	118207	114	93	60	89
NM_001159620	11568	15	1	2	6
NM_001159624	21386	10	4	1	5
NM_001159630	124919	19	7	5	10.3333
NM_001159697	25043	16	10	21	15.6667
NM_001159743	9531	21	4	10	11.6667
NM_001159774	47379	36	6	3	15
NM_001159865	14984	8	7	5	6.66667
NM_001159907	48414	342	140	47	176.333
NM_001159910	69073	848	219	104	390.333
NM_001159942	226926	185	81	122	129.333
NM_001159963	37532	208	158	85	150.333
NM_001160131	138158	16	5	4	8.33333
NM_001160319	108874	3693	1803	2423	2639.67
NM_001160366	14254	13	2	2	5.66667
NM_001160386	306813	171	50	61	94
NM_001160399	29778	2	3	2	2.33333
NM_001160400	48754	237	38	37	104
NM_001160403	1368382	1467	1708	921	1365.33
NM_001161362	146844	1390	438	302	710
NM_001161406	45105	9	3	0	4
NM_001161413	16488	42	8	6	18.6667
NM_001161428	14155	20	4	1	8.33333
NM_001161665	403733	977	106	122	401.667
NM_001161712	11658	25	6	2	11
NM_001161722	55380	16	2	3	7
NM_001161763	26484	22	5	2	9.66667
NM_001161823	43040	97	45	48	63.3333
NM_001161825	47585	10	1	0	3.66667
NM_001161832	50331	7	3	5	5
NM_001161845	117719	12	2	2	5.33333
NM_001162364	29859	16	8	3	9
NM_001162415	40211	1112	566	660	779.333
NM_001162417	37390	110	34	29	57.6667
NM_001162425	9222	40	87	51	59.3333
NM_001162503	44193	230	162	218	203.333
NM_001162532	36613	26	16	19	20.3333
NM_001162540	109670	10	2	4	5.33333
NM_001162855	14856	263	109	121	164.333
NM_001162864	45228	103	20	12	45
NM_001162883	7292	9	4	7	6.66667
NM_001162896	34207	84	13	9	35.3333
NM_001162906	102053	238	161	421	273.333
NM_001162908	97863	1154	360	321	611.667
NM_001162909	8097	179	33	25	79
NM_001162910	15459	11	5	1	5.66667
NM_001162917	108657	3108	1139	1693	1980
NM_001162921	56127	569	570	629	589.333
NM_001162922	11548	90	9	15	38
NM_001162937	72219	14	7	3	8
NM_001162938	24713	4	2	5	3.66667
NM_001162939	12907	4	8	25	12.3333
NM_001162945	13444	282	70	81	144.333
NM_001162946	111281	10586	2340	4760	5895.33
NM_001162956	78308	420	44	74	179.333
NM_001162970	24053	78	16	8	34
NM_001162977	105009	15	4	12	10.3333
NM_001162989	25144	100	38	28	55.3333
NM_001162999	111709	7300	1116	1199	3205
NM_001163013	61056	476	241	240	319
NM_001163014	29032	23	8	4	11.6667
NM_001163026	111334	1731	816	955	1167.33
NM_001163061	23067	10	5	7	7.33333
NM_001163064	25053	185	92	57	111.333
NM_001163085	134919	228	56	54	112.667
NM_001163126	282762	3524	1300	1174	1999.33
NM_001163138	11095	85	26	24	45
NM_001163170	24220	137	25	23	61.6667
NM_001163189	108231	5	1	2	2.66667
NM_001163223	575349	347	111	88	182
NM_001163246	20269	132	81	99	104
NM_001163262	204487	9201	1676	1603	4160
NM_001163288	123951	925	221	349	498.333
NM_001163300	21313	1173	808	768	916.333
NM_001163314	84685	905	1278	1250	1144.33
NM_001163319	24053	332	127	98	185.667
NM_001163346	24966	31	29	17	25.6667
NM_001163379	7589	62	39	29	43.3333
NM_001163388	41787	284	25	21	110
NM_001163397	148175	27	10	13	16.6667
NM_001163455	157545	1563	748	889	1066.67
NM_001163457	53534	155	96	64	105
NM_001163488	39859	71	23	29	41
NM_001163501	69708	605	174	137	305.333
NM_001163504	79389	8557	2113	2686	4452
NM_001163505	44570	44	10	3	19
NM_001163539	21227	8	3	6	5.66667
NM_001163553	12509	8	6	4	6
NM_001163559	173125	28	13	12	17.6667
NM_001163564	30348	160	100	94	118
NM_001163567	56611	15	7	4	8.66667
NM_001163571	8975	6	10	9	8.33333
NM_001163572	35142	743	369	317	476.333
NM_001163587	18303	15	1	3	6.33333
NM_001163609	56149	34	20	8	20.6667
NM_001163610	242671	58	22	29	36.3333
NM_001163616	32006	11	3	12	8.66667
NM_001163625	23055	11	1	1	4.33333
NM_001163627	34412	203	62	50	105
NM_001163635	59246	1992	1283	1632	1635.67
NM_001163637	156366	10	3	5	6
NM_001163640	261881	13188	5799	1977	6988
NM_001163663	33683	16	14	7	12.3333
NM_001163709	20137	270	36	15	107
NM_001163729	6380	17	5	5	9
NM_001163741	21041	405	106	91	200.667
NM_001163751	5474	3	3	4	3.33333
NM_001163753	70810	23	18	13	18
NM_001163754	82579	941	548	523	670.667
NM_001163766	16782	66	2	1	23
NM_001163774	19291	793	209	180	394
NM_001163780	62918	138	49	32	73
NM_001163793	32956	19	2	2	7.66667
NM_001163818	15088	806	1292	1813	1303.67
NM_001163833	9964	34	5	2	13.6667
NM_001163996	19703	137	59	39	78.3333
NM_001164056	194683	53	18	11	27.3333
NM_001164074	9328	14	10	4	9.33333
NM_001164089	7119	96	21	15	44
NM_001164185	15700	46	44	5	31.6667
NM_001164195	29301	79	18	12	36.3333
NM_001164197	9918	14	2	2	6
NM_001164201	80189	11	2	4	5.66667
NM_001164202	20540	11	5	1	5.66667
NM_001164231	40636	575	216	135	308.667
NM_001164258	58607	64	12	12	29.3333
NM_001164274	72354	118	78	36	77.3333
NM_001164320	11121	95	24	13	44
NM_001164327	20367	34	3	14	17
NM_001164329	15776	29	5	5	13
NM_001164361	50712	192	70	82	114.667
NM_001164363	128359	17	5	3	8.33333
NM_001164367	40771	19	2	0	7
NM_001164370	226817	2398	403	336	1045.67
NM_001164420	37480	8	8	19	11.6667
NM_001164477	50463	19	6	4	9.66667
NM_001164491	112460	7	13	7	9
NM_001164493	298217	29	22	24	25
NM_001164503	44615	158	129	144	143.667
NM_001164504	109027	16	4	12	10.6667
NM_001164528	62694	410	113	23	182
NM_001164565	7578	198	21	62	93.6667
NM_001164576	25777	72	15	2	29.6667
NM_001164580	57235	876	466	382	574.667
NM_001164581	19268	367	91	82	180
NM_001164593	375010	32	4	13	16.3333
NM_001164597	10359	122	53	47	74
NM_001164598	5141	27	23	29	26.3333
NM_001164622	21215	20	15	11	15.3333
NM_001164640	10894	28	3	1	10.6667
NM_001164659	84037	12	2	3	5.66667
NM_001164662	90563	12	3	0	5
NM_001164663	68824	24	7	25	18.6667
NM_001164669	204025	72	25	25	40.6667
NM_001164676	15246	83	14	20	39
NM_001164679	10049	22	11	2	11.6667
NM_001164681	9816	568	127	141	278.667
NM_001164682	42455	28	3	1	10.6667
NM_001164683	61378	112	106	85	101
NM_001164763	36638	265	107	103	158.333
NM_001164770	21872	6	3	6	5
NM_001164804	64993	7	3	6	5.33333
NM_001164805	437646	153	55	69	92.3333
NM_001165919	39810	9	3	6	6
NM_001165948	46001	1	6	5	4
NM_001165955	70121	10	6	3	6.33333
NM_001165957	23657	66	14	8	29.3333
NM_001165981	43399	304	22	18	114.667
NM_001165999	1245097	58	18	19	31.6667
NM_001166030	80953	6	3	1	3.33333
NM_001166063	22900	1465	514	581	853.333
NM_001166064	33851	292	89	62	147.667
NM_001166065	26226	116	36	13	55
NM_001166066	63465	12	4	4	6.66667
NM_001166067	67571	11	3	3	5.66667
NM_001166207	139246	62	25	27	38
NM_001166210	141619	27	10	7	14.6667
NM_001166213	10504	12	4	2	6
NM_001166218	22577	42	14	19	25
NM_001166408	145654	13	21	14	16
NM_001166432	25283	26	6	27	19.6667
NM_001166459	39074	139	22	20	60.3333
NM_001166493	93149	45	45	54	48
NM_001166497	14356	157	40	22	73
NM_001166501	212334	61	66	48	58.3333
NM_001166581	14032	101	74	129	101.333
NM_001166593	5247	8	13	12	11
NM_001166629	11131	9	1	1	3.66667
NM_001166632	39356	16	7	10	11
NM_001166640	38644	21	28	10	19.6667
NM_001166645	10246	14	21	12	15.6667
NM_001166654	80447	13	1	0	4.66667
NM_001166659	164935	35	11	11	19
NM_001166705	99586	143	6	13	54
NM_001167578	22652	29	2	2	11
NM_001167587	8846	13	2	9	8
NM_001167746	107497	69	22	14	35
NM_001167777	185139	31	12	23	22
NM_001167799	14219	54	33	20	35.6667
NM_001167879	13185	9	7	57	24.3333
NM_001167883	35556	126	68	30	74.6667
NM_001167891	179503	12	5	14	10.3333
NM_001167898	84519	53	18	19	30
NM_001167907	27633	10	2	14	8.66667
NM_001167936	35989	565	455	107	375.667
NM_001167983	281769	2868	827	557	1417.33
NM_001168273	20530	165	39	35	79.6667
NM_001168281	120267	8	3	1	4
NM_001168289	243397	49	15	14	26
NM_001168292	109074	1295	515	538	782.667
NM_001168321	123618	63	49	36	49.3333
NM_001168382	155318	2444	1028	1655	1709
NM_001168423	133848	40	12	11	21
NM_001168471	18774	48	45	14	35.6667
NM_001168652	11977	83	14	3	33.3333
NM_001168658	15467	242	122	98	154
NM_001169114	25598	9	8	8	8.33333
NM_001170454	10616	72	60	36	56
NM_001170479	71673	10	10	4	8
NM_001170485	12335	17	10	7	11.3333
NM_001170705	74496	19	5	12	12
NM_001170711	30939	12	5	1	6
NM_001170746	1477746	149	64	78	97
NM_001170847	189775	77	13	14	34.6667
NM_001170853	22968	13	13	13	13
NM_001170858	13665	176	24	21	73.6667
NM_001170884	8212	27	1	2	10
NM_001170976	10738	16	4	2	7.33333
NM_001171003	140293	2443	1457	2472	2124
NM_001171011	42029	3	6	5	4.66667
NM_001171024	24434	182	177	155	171.333
NM_001172095	163368	28	5	13	15.3333
NM_001172100	12526	373	80	51	168
NM_001172107	47596	641	63	19	241
NM_001172121	1057167	47	17	20	28
NM_001172148	109085	221	34	39	98
NM_001172424	34819	291	67	48	135.333
NM_001172588	25811	19	1	8	9.33333
NM_001173459	53341	13	5	3	7
NM_001173460	79312	62	16	23	33.6667
NM_001173500	13242	177	51	55	94.3333
NM_001177308	5214	20	18	13	17
NM_001177399	12576	23	5	6	11.3333
NM_001177408	25539	48	2	2	17.3333
NM_001177412	16585	44	6	5	18.3333
NM_001177480	119337	524	70	82	225.333
NM_001177505	7654	141	41	49	77
NM_001177511	30902	11	2	3	5.33333
NM_001177527	9898	50	13	6	23
NM_001177535	10979	24	6	4	11.3333
NM_001177536	71239	108	15	15	46
NM_001177543	146208	364	64	73	167
NM_001177561	14895	442	104	83	209.667
NM_001177567	149825	41	10	16	22.3333
NM_001177568	14453	209	89	82	126.667
NM_001177572	175956	11	5	5	7
NM_001177628	20058	32	36	14	27.3333
NM_001177705	11422	13	1	1	5
NM_001177715	27554	28	18	10	18.6667
NM_001177730	11056	12	8	9	9.66667
NM_001177758	82499	107	68	78	84.3333
NM_001177767	38950	46	8	9	21
NM_001177773	163622	1338	543	446	775.667
NM_001177795	160710	22	10	22	18
NM_001177858	9027	80	3	3	28.6667
NM_001177878	96445	144	53	50	82.3333
NM_001177886	60361	1392	73	60	508.333
NM_001177964	110543	23	6	6	11.6667
NM_001184980	46841	18	3	2	7.66667
NM_001184981	27768	15	7	47	23
NM_001185162	9857	10	4	3	5.66667
NM_001190352	260166	35	15	16	22
NM_001190371	53364	195	102	100	132.333
NM_001190373	69711	28	8	4	13.3333
NM_001190374	278755	40	16	8	21.3333
NM_001190401	183666	5195	2956	3796	3982.33
NM_001190448	84044	112	18	9	46.3333
NM_001190483	405319	921	81	42	348
NM_001190734	79740	10	8	7	8.33333
NM_001190786	28566	98	15	24	45.6667
NM_001190817	186498	539	187	173	299.667
NM_001190886	363853	13	4	3	6.66667
NM_001190989	50626	10	13	10	11
NM_001194940	384704	140	95	123	119.333
NM_001195036	81869	45	13	22	26.6667
NM_001195065	266680	25	10	16	17
NM_001195074	19649	16	5	8	9.66667
NM_001195075	97472	1669	546	331	848.667
NM_001195130	98180	770	122	165	352.333
NM_001195229	185879	33	6	21	20
NM_001195284	75539	46	7	16	23
NM_001195298	14968	12	2	3	5.66667
NM_001195596	8330	746	530	649	641.667
NM_001195632	149376	1307	1341	1505	1384.33
NM_001195633	96561	1359	704	835	966
NM_001195662	118396	36	17	12	21.6667
NM_001195693	16763	10	2	2	4.66667
NM_001195730	5927	140	33	25	66
NM_001195732	35401	37	6	3	15.3333
NM_001195748	130924	59	48	42	49.6667
NM_001195774	23172	0	2	0	0.666667
NM_001197147	352397	13	4	2	6.33333
NM_001198587	1540430	13	8	18	13
NM_001198789	5652	16	12	5	11
NM_001198955	8140	66	32	40	46
NM_001198971	54220	11	2	2	5
NM_001198977	65356	7	3	13	7.66667
NM_001199004	28774	17	17	21	18.3333
NM_001199020	21384	24	23	29	25.3333
NM_001199048	35502	636	360	406	467.333
NM_001199059	42519	319	160	150	209.667
NM_001199115	14404	267	44	33	114.667
NM_001199186	34310	20	11	19	16.6667
NM_001199218	17814	518	897	475	630
NM_001199224	894812	236	101	119	152
NM_001199244	896157	64	31	49	48
NM_001199265	163721	111	33	58	67.3333
NM_001199274	15890	17	10	9	12
NM_001199304	415236	13	1	0	4.66667
NM_001199357	162095	110	12	11	44.3333
NM_001199494	18241	1	6	2	3
NM_001199685	154970	3074	1174	1014	1754
NM_001199695	14989	8	10	4	7.33333
NM_001199945	28577	249	66	97	137.333
NM_001200004	73390	4254	494	1487	2078.33
NM_001200023	8324	130	22	10	54
NM_001200025	41317	26	6	10	14
NM_001200028	17690	16	4	2	7.33333
NM_001201322	18585	39	2	4	15
NM_001201395	20315	17	6	6	9.66667
NM_001201470	71473	584	328	162	358
NM_001204904	37548	167	62	72	100.333
NM_001204907	36746	118	49	53	73.3333
NM_001204910	18382	13	5	17	11.6667
NM_001204912	6097	8	13	22	14.3333
NM_001204973	10589	15	8	11	11.3333
NM_001204983	101771	7343	3429	5795	5522.33
NM_001205025	5713	9	12	1	7.33333
NM_001205057	10105	45	17	7	23
NM_001205095	28350	198	89	86	124.333
NM_001205098	709982	103	29	19	50.3333
NM_001205181	15041	22	4	6	10.6667
NM_001205188	58416	116	70	61	82.3333
NM_001205236	32209	8	4	7	6.33333
NM_001205249	22803	16	9	4	9.66667
NM_001205286	33465	15	30	13	19.3333
NM_001205346	18469	3	3	0	2
NM_001205361	40862	15	17	18	16.6667
NM_001206849	5659	50	23	35	36
NM_001242345	6310	5	14	25	14.6667
NM_001242388	33079	988	218	166	457.333
NM_001242407	21287	12	3	2	5.66667
NM_001242943	10569	76	21	22	39.6667
NM_001242945	88461	35	14	11	20
NM_001243021	27899	240	135	115	163.333
NM_001243043	95274	15	11	18	14.6667
NM_001243067	17153	385	127	86	199.333
NM_001243100	22390	160	7	6	57.6667
NM_001243123	116526	5222	2836	3297	3785
NM_001243138	37396	428	73	45	182
NM_001243192	84877	1504	368	337	736.333
NM_001243223	64755	11	2	3	5.33333
NM_001243261	20197	49	56	60	55
NM_001243748	10713	9	14	15	12.6667
NM_001243762	160947	573	223	110	302
NM_001243792	605879	4330	141	174	1548.33
NM_001243837	75012	10	8	18	12
NM_001243857	52749	177	51	49	92.3333
NM_001243908	8297	35	10	6	17
NM_001243916	7147	39	43	63	48.3333
NM_001244628	9996	13	6	7	8.66667
NM_001247984	99720	453	142	73	222.667
NM_001251881	18343	304	70	36	136.667
NM_001252067	19662	19	2	4	8.33333
NM_001252070	309783	262	55	89	135.333
NM_001252072	415809	32	13	15	20
NM_001252081	16068	13	4	5	7.33333
NM_001252220	29845	37	29	27	31
NM_001252313	122090	4	7	8	6.33333
NM_001252435	209914	7	10	12	9.66667
NM_001252454	17944	47	15	11	24.3333
NM_001252458	27560	7	12	4	7.66667
NM_001252508	39240	20	7	8	11.6667
NM_001252513	45548	13	2	6	7
NM_001252542	10602	82	31	20	44.3333
NM_001252555	17559	16	1	7	8
NM_001252628	22482	15	2	2	6.33333
NM_001252636	83233	178	22	44	81.3333
NM_001252658	26343	86	137	62	95
NM_001252661	36698	1716	1754	3357	2275.67
NM_001253685	26398	9	3	1	4.33333
NM_001253713	156921	141	56	63	86.6667
NM_001253754	281445	103	34	179	105.333
NM_001253806	26668	19	4	12	11.6667
NM_001253831	109896	21	7	2	10
NM_001253848	14788	41	43	39	41
NM_001253865	267568	39	30	14	27.6667
NM_001253894	82852	73	39	17	43
NM_001254744	36221	173	11	8	64
NM_001254754	13872	9	12	9	10
NM_001254761	109806	56	58	35	49.6667
NM_001254946	43081	23	14	14	17
NM_001254951	29645	16	6	7	9.66667
NM_001255991	53600	218	66	46	110
NM_001256052	17416	343	118	123	194.667
NM_001256059	96893	179	11	11	67
NM_001256158	14359	11	5	3	6.33333
NM_001256489	54068	382	52	99	177.667
NM_001256493	30357	218	40	35	97.6667
NM_001256520	15226	209	93	97	133
NM_001256886	23283	30	18	11	19.6667
NM_001267593	50704	5	1	3	3
NM_001267622	409977	197	101	144	147.333
NM_001267625	273986	90	7	8	35
NM_001270430	14459	17	47	133	65.6667
NM_001270475	199477	3318	682	602	1534
NM_001270494	187158	356	96	116	189.333
NM_001270514	18584	20	13	9	14
NM_001270537	28419	24	7	14	15
NM_001270553	333595	1505	823	814	1047.33
NM_001270806	167823	28	10	6	14.6667
NM_001270812	27504	17	5	8	10
NM_001270842	23416	8	12	9	9.66667
NM_001271008	80322	169	104	110	127.667
NM_001271016	78551	545	155	142	280.667
NM_001271386	869514	213	87	144	148
NM_001271435	5744	121	39	33	64.3333
NM_001271540	65041	22	2	1	8.33333
NM_001271542	23310	93	76	87	85.3333
NM_001271547	28121	10	3	5	6
NM_001271590	7347	109	23	12	48
NM_001271726	144337	76	12	6	31.3333
NM_001271730	5353	144	95	56	98.3333
NM_001271761	135918	255	1	0	85.3333
NM_001271806	13151	49	12	0	20.3333
NM_001271898	27163	699	86	47	277.333
NM_001271963	176700	10	2	0	4
NM_001272045	19558	36	32	26	31.3333
NM_001272064	97635	3	14	9	8.66667
NM_001276250	52697	15	1	2	6
NM_001276279	54919	44	21	13	26
NM_001276455	16340	52	74	47	57.6667
NM_001276465	222384	131	75	78	94.6667
NM_001276764	400438	17	7	10	11.3333
NM_001277076	49820	74	5	13	30.6667
NM_001277149	178044	5462	3289	3385	4045.33
NM_001277202	6416	15	8	17	13.3333
NM_001277939	18664	275	57	44	125.333
NM_001278075	70940	27	12	9	16
NM_001278671	79727	37	20	35	30.6667
NM_001281466	35270	299	40	39	126
NM_001281475	43515	15	7	11	11
NM_001281491	29194	32	7	6	15
NM_001281537	15379	15	9	4	9.33333
NM_001281830	9808	344	127	222	231
NM_001281848	194344	16	4	9	9.66667
NM_001281871	37335	556	81	25	220.667
NM_001281955	579613	63	27	36	42
NM_001282028	21296	172	41	29	80.6667
NM_001282042	36658	395	63	73	177
NM_001282055	46269	614	303	304	407
NM_001282064	12885	14	3	2	6.33333
NM_001282073	41608	173	62	43	92.6667
NM_001282093	60197	20	37	21	26
NM_001282095	18394	22	9	1	10.6667
NM_001282148	10801	2	0	0	0.666667
NM_001282443	5790	24	1	0	8.33333
NM_001282737	7670	63	37	37	45.6667
NM_001284258	73388	10	3	2	5
NM_001284270	22694	277	45	11	111
NM_001284387	19029	10	4	1	5
NM_001285530	90949	58	33	12	34.3333
NM_001285805	711479	13594	5404	4601	7866.33
NM_001285813	349700	9	8	6	7.66667
NM_001285867	41827	35	30	12	25.6667
NM_001285873	29109	25	4	4	11
NM_001285949	48941	177	40	32	83
NM_001285980	43444	446	189	238	291
NM_001286002	26027	16	11	10	12.3333
NM_001286005	24032	1868	415	202	828.333
NM_001286100	151618	987	1	3	330.333
NM_001286346	168412	10	5	7	7.33333
NM_001286507	29273	674	146	109	309.667
NM_001286545	30838	37	9	5	17
NM_001286560	33057	17	16	10	14.3333
NM_001286628	38407	1	1	2	1.33333
NM_001286662	77243	135	14	8	52.3333
NM_001287074	200201	38	10	9	19
NM_001287087	11706	16	8	10	11.3333
NM_001287119	38870	77	11	5	31
NM_001287164	90767	194	104	109	135.667
NM_001287179	62972	18	8	4	10
NM_001287206	5965	17	12	3	10.6667
NM_001288578	18300	38	35	25	32.6667
NM_001288586	21884	11	9	2	7.33333
NM_001289118	9558	75	10	10	31.6667
NM_001289428	166518	66	23	46	45
NM_001289442	80258	6	6	10	7.33333
NM_001289448	13046	17	4	3	8
NM_001289471	9248	246	349	133	242.667
NM_001289533	73691	10	9	1	6.66667
NM_001289543	26687	131	62	47	80
NM_001289562	46459	533	57	56	215.333
NM_001289598	28554	44	19	8	23.6667
NM_001289606	26249	19	17	10	15.3333
NM_001289617	10386	76	45	41	54
NM_001289653	308813	60	21	27	36
NM_001289660	225638	2366	534	519	1139.67
NM_001289677	8516	6	3	1	3.33333
NM_001289686	259919	1326	123	90	513
NM_001289694	11966	25	12	5	14
NM_001289727	55909	16	7	4	9
NM_001289731	123134	5	12	2	6.33333
NM_001289739	71986	214	281	222	239
NM_001289774	86378	580	158	174	304
NM_001289856	16921	16	1	1	6
NM_001289859	80479	22	5	4	10.3333
NM_001290128	27342	69	49	27	48.3333
NM_001290273	24534	7207	2984	3749	4646.67
NM_001290308	119736	82	8	24	38
NM_001290316	8782	20	0	1	7
NM_001290320	52209	27	10	14	17
NM_001290337	6263	56	12	6	24.6667
NM_001290345	147513	3197	2497	2837	2843.67
NM_001290395	40496	164	1	3	56
NM_001290410	659795	54	13	31	32.6667
NM_001290414	523427	90	33	46	56.3333
NM_001290420	32222	312	52	40	134.667
NM_001290475	69431	4	5	0	3
NM_001290485	55104	325	65	109	166.333
NM_001290487	6137	71	42	16	43
NM_001290512	305599	10	5	2	5.66667
NM_001290513	9606	25	2	2	9.66667
NM_001290528	18207	206	66	48	106.667
NM_001290543	58077	51	18	27	32
NM_001290563	18608	174	67	29	90
NM_001290624	10808	118	24	7	49.6667
NM_001290625	218188	31	16	11	19.3333
NM_001290631	13903	189	17	14	73.3333
NM_001290634	50142	194	209	162	188.333
NM_001290642	52833	4	0	0	1.33333
NM_001290684	159978	2	2	0	1.33333
NM_001290697	6386	9	9	8	8.66667
NM_001290699	53055	9	7	3	6.33333
NM_001290707	459848	183	52	49	94.6667
NM_001290712	8739	19	6	16	13.6667
NM_001290729	69055	665	265	286	405.333
NM_001290750	100389	78	23	17	39.3333
NM_001290769	10669	146	137	42	108.333
NM_001290781	8627	17	3	5	8.33333
NM_001290785	64572	4	0	8	4
NM_001290789	10562	48	17	12	25.6667
NM_001290814	451254	52	25	44	40.3333
NM_001290819	12853	59	24	24	35.6667
NM_001290982	166221	10	10	2	7.33333
NM_001290984	8136	108	37	35	60
NM_001290997	577821	103	40	70	71
NM_001291014	21120	18	7	6	10.3333
NM_001291048	16327	48	3	4	18.3333
NM_001291060	22337	48	18	9	25
NM_001291068	24635	450	96	46	197.333
NM_001291146	12402	10	15	9	11.3333
NM_001291153	12105	3	1	7	3.66667
NM_001291154	26659	17	11	1	9.66667
NM_001291155	17630	12	3	5	6.66667
NM_001291353	18221	14	7	10	10.3333
NM_001291358	28230	216	29	27	90.6667
NM_001291455	117308	10	7	13	10
NM_001291910	135613	75	36	13	41.3333
NM_001293631	6042	10	4	4	6
NM_001293683	20119	150	16	12	59.3333
NM_001293741	12673	17	7	5	9.66667
NM_001293783	109615	511	135	272	306
NM_001293804	47719	11	2	2	5
NM_001294331	105153	27	17	24	22.6667
NM_001301164	15644	16	0	3	6.33333
NM_001301341	12212	6	5	7	6
NM_001301628	92014	11	2	2	5
NM_001301644	57663	5	6	8	6.33333
NM_001301651	17506	16	23	7	15.3333
NM_001301817	183064	1051	356	192	533
NM_001302116	78477	8	5	5	6
NM_001302203	16191	32	5	1	12.6667
NM_001302337	22247	551	109	117	259
NM_001302346	15486	11	3	0	4.66667
NM_001302380	36327	2711	745	878	1444.67
NM_001302385	71520	34	19	13	22
NM_001302471	18936	115	6	14	45
NM_001302496	9254	10	38	3	17
NM_001302546	82901	40	17	14	23.6667
NM_001302674	36986	11	2	1	4.66667
NM_001302802	44483	33	20	14	22.3333
NM_001302811	26461	236	255	200	230.333
NM_001302966	17600	201	68	60	109.667
NM_001303239	17203	10	2	4	5.33333
NM_001303273	23249	3	3	4	3.33333
NM_001303469	67747	163	77	205	148.333
NM_001304266	49237	3176	1154	882	1737.33
NM_001304432	20157	24	7	4	11.6667
NM_001304439	57462	19	17	20	18.6667
NM_001304544	328737	149	150	274	191
NM_001304721	129237	823	384	483	563.333
NM_001304744	18657	39	62	52	51
NM_001304758	23698	15	3	2	6.66667
NM_001304761	26986	107	35	27	56.3333
NM_001304965	24667	65	4	9	26
NM_001305042	170676	11	6	4	7
NM_001305143	38616	37	10	16	21
NM_001305185	184892	1763	294	143	733.333
NM_001305231	5124	76	39	21	45.3333
NM_001305421	38195	2	4	0	2
NM_001305423	86889	14	1	1	5.33333
NM_001305425	14615	31	18	26	25
NM_001305436	79414	26	20	16	20.6667
NM_001305627	9352	25	4	8	12.3333
NM_001305935	199104	3705	466	528	1566.33
NM_001306204	48055	13	4	2	6.33333
NM_001308449	59543	224	72	60	118.667
NM_001308498	9718	15	11	4	10
NM_001309445	49257	5	6	2	4.33333
NM_001309799	9882	369	152	118	213
NM_001310055	27990	77	12	22	37
NM_001310070	99519	1226	207	128	520.333
NM_001310331	17428	3	0	1	1.33333
NM_001310335	381960	223	85	74	127.333
NM_001310433	19484	30	14	9	17.6667
NM_001310455	729079	396	111	162	223
NM_001310456	11926	15	1	0	5.33333
NM_001310467	32659	16	0	2	6
NM_001310535	27282	13	10	8	10.3333
NM_001310585	23655	4	18	8	10
NM_001310602	23659	60	41	51	50.6667
NM_001310607	35635	13	16	13	14
NM_001310628	59411	27	9	13	16.3333
NM_001310629	49188	7	14	7	9.33333
NM_001310640	14469	3	18	4	8.33333
NM_001310645	48588	87	25	31	47.6667
NM_001310650	40757	3	9	2	4.66667
NM_001310664	82801	139	91	112	114
NM_001310703	13345	11	5	6	7.33333
NM_001310713	61542	6	3	1	3.33333
NM_001310762	739849	38	21	20	26.3333
NM_001310837	33353	353	535	265	384.333
NM_001311069	74983	37	2	2	13.6667
NM_001311083	15245	172	49	42	87.6667
NM_001311113	33034	14	4	5	7.66667
NM_001311117	80571	62	60	28	50
NM_001311132	36489	1204	530	1205	979.667
NM_001311144	171475	81	28	39	49.3333
NM_001311146	24367	6	6	9	7
NM_001311148	135921	43	10	8	20.3333
NM_001311157	44715	25	5	4	11.3333
NM_001312644	173790	449	62	67	192.667
NM_001312649	21829	27	19	6	17.3333
NM_001312905	417024	515	139	108	254
NM_001312907	66051	42	31	12	28.3333
NM_001312914	353987	63	26	30	39.6667
NM_001312918	28014	30	3	7	13.3333
NM_001313698	31638	45	18	8	23.6667
NM_001313725	8555	23	8	2	11
NM_001313745	16726	6	1	4	3.66667
NM_001313916	5309	15	10	16	13.6667
NM_001313920	46207	36	34	30	33.3333
NM_001313979	21544	13	14	4	10.3333
NM_001313983	27222	231	398	555	394.667
NM_001314010	78783	151	102	121	124.667
NM_001314013	95961	11	11	6	9.33333
NM_001314027	37011	12	15	27	18
NM_001316667	60719	2048	319	594	987
NM_001316671	38232	61	31	22	38
NM_001316672	345277	2	8	12	7.33333
NM_001316746	44456	13	4	2	6.33333
NM_001317244	19656	6	10	2	6
NM_001317354	6126	1	100	66	55.6667
NM_001317723	22580	97	48	49	64.6667
NM_001319147	14088	12	2	0	4.66667
NM_001319151	480832	46	27	23	32
NM_001319156	585702	202	83	83	122.667
NM_001320366	26070	24	14	12	16.6667
NM_001320725	60048	967	311	347	541.667
NM_001320946	93205	16	4	4	8
NM_001322338	42278	42	10	14	22
NM_001324416	40144	60	5	13	26
NM_001324473	154094	34	13	19	22
NM_001324525	56341	11	3	7	7
NM_001324526	31088	20	3	5	9.33333
NM_001324535	32613	44	2	2	16
NM_001324550	25143	582	172	122	292
NM_001326288	985904	15041	3905	2508	7151.33
NM_001327810	306714	26	15	13	18
NM_001327821	413061	39	21	23	27.6667
NM_001327938	577509	11	9	15	11.6667
NM_001327998	147923	26	9	4	13
NM_001328514	65133	18	11	4	11
NM_001329047	94376	1423	832	1040	1098.33
NM_007376	43154	18251	14531	15849	16210.3
NM_007378	135602	26	9	6	13.6667
NM_007379	19866	121	12	4	45.6667
NM_007381	32471	1266	626	523	805
NM_007382	22291	1325	189	113	542.333
NM_007383	9048	155	66	39	86.6667
NM_007386	55745	2600	859	1252	1570.33
NM_007387	11187	307	100	94	167
NM_007390	113835	40	8	4	17.3333
NM_007395	38477	611	273	144	342.667
NM_007396	89156	1929	1628	2086	1881
NM_007399	101248	1551	787	761	1033
NM_007400	341899	406	104	103	204.333
NM_007405	17648	539	111	71	240.333
NM_007408	13495	1801	919	1711	1477
NM_007409	13047	3709	2784	4188	3560.33
NM_007414	7291	10	3	3	5.33333
NM_007415	32280	206	75	31	104
NM_007421	21309	99	3	2	34.6667
NM_007422	33332	571	394	621	528.667
NM_007423	18194	214	25	24	87.6667
NM_007426	51300	306	9	15	110
NM_007428	13121	517	94	190	267
NM_007431	54654	747	84	42	291
NM_007435	21938	303	29	29	120.333
NM_007439	735320	129	48	41	72.6667
NM_007443	10898	1674	1397	1021	1364
NM_007452	10473	157	97	79	111
NM_007456	17248	390	136	160	228.667
NM_007457	11067	58	26	19	34.3333
NM_007459	70832	1580	433	610	874.333
NM_007460	35234	1013	540	536	696.333
NM_007462	101207	1820	1053	930	1267.67
NM_007464	24470	690	96	72	286
NM_007465	18832	14	20	13	15.6667
NM_007472	12257	18	21	16	18.3333
NM_007478	25493	525	425	261	403.667
NM_007479	19062	687	341	477	501.667
NM_007482	12264	2536	2019	2466	2340.33
NM_007488	163764	23	18	17	19.3333
NM_007496	246993	6398	2677	1940	3671.67
NM_007497	33390	1227	640	649	838.667
NM_007498	13037	4	285	489	259.333
NM_007499	99550	623	85	36	248
NM_007502	31625	240	113	57	136.667
NM_007504	17214	5	3	1	3
NM_007505	9101	537	177	188	300.667
NM_007508	53616	576	261	337	391.333
NM_007509	24982	538	389	359	428.667
NM_007510	27442	920	459	474	617.667
NM_007511	65727	1127	431	333	630.333
NM_007514	59704	56	8	12	25.3333
NM_007519	17141	4569	1511	2613	2897.67
NM_007520	34393	1640	874	1108	1207.33
NM_007523	8815	174	33	20	75.6667
NM_007525	75438	34	9	17	20
NM_007527	5204	110	117	123	116.667
NM_007533	28910	2472	913	899	1428
NM_007542	12336	7	3	6	5.33333
NM_007544	23702	714	117	70	300.333
NM_007546	17774	573	54	39	222
NM_007549	44351	12	21	25	19.3333
NM_007552	9612	32	39	27	32.6667
NM_007555	124952	82	23	49	51.3333
NM_007556	154599	129	59	140	109.333
NM_007557	72310	131	2	10	47.6667
NM_007561	113803	1381	876	823	1026.67
NM_007563	29255	192	84	71	115.667
NM_007564	5254	387	436	646	489.667
NM_007566	175062	6318	3624	4663	4868.33
NM_007567	94362	32	21	18	23.6667
NM_007568	45734	44	39	59	47.3333
NM_007569	5811	9	8	15	10.6667
NM_007573	5181	46	18	31	31.6667
NM_007576	25698	5564	5156	9261	6660.33
NM_007583	125658	11	1	6	6
NM_007585	38103	23	27	20	23.3333
NM_007589	13535	205	182	149	178.667
NM_007590	8654	35	36	12	27.6667
NM_007592	97549	4289	854	791	1978
NM_007596	9412	155	91	65	103.667
NM_007602	56716	19	3	6	9.33333
NM_007604	29439	458	343	461	420.667
NM_007606	8836	2608	442	1854	1634.67
NM_007608	28775	2101	307	253	887
NM_007609	27943	20	13	27	20
NM_007610	17524	65	65	31	53.6667
NM_007611	45215	512	98	48	219.333
NM_007618	10588	418	957	364	579.667
NM_007619	84785	656	396	299	450.333
NM_007622	19505	524	218	178	306.667
NM_007623	8255	35	18	4	19
NM_007624	13089	183	154	127	154.667
NM_007625	8667	71	20	31	40.6667
NM_007630	13866	66	6	14	28.6667
NM_007631	9995	17	54	9	26.6667
NM_007633	9507	21	6	0	9
NM_007634	28178	292	50	74	138.667
NM_007635	8659	51	20	18	29.6667
NM_007636	12817	138	150	137	141.667
NM_007638	16973	129	125	96	116.667
NM_007644	64347	2985	1366	2202	2184.33
NM_007646	43566	49	26	74	49.6667
NM_007649	23203	16	2	14	10.6667
NM_007651	31289	7	5	10	7.33333
NM_007657	34490	45	37	10	30.6667
NM_007658	18312	60	26	5	30.3333
NM_007659	16278	13	3	0	5.33333
NM_007664	220370	18355	10441	11157	13317.7
NM_007666	144977	18	11	14	14.3333
NM_007668	5289	46	22	4	24
NM_007684	13866	133	101	108	114
NM_007690	67646	1629	1305	1876	1603.33
NM_007691	18177	19	11	12	14
NM_007697	222160	54	14	8	25.3333
NM_007702	24231	9	2	2	4.33333
NM_007708	160686	40	3	16	19.6667
NM_007710	10490	0	0	2	0.666667
NM_007711	72923	6	4	5	5
NM_007713	15150	580	287	289	385.333
NM_007723	39056	65	26	20	37
NM_007729	190217	24	5	4	11
NM_007733	329755	71	20	21	37.3333
[truncated: 7,662 more rows]
